# Supplementary material for: Synthesis of TiOxNy oxynitrides with a tunable nitrogen content
Source: Royal Society of Chemistry journal article supplement (doi:10.1039/d3dt02892e), 2023-12-06
Supplement: d3dt02892e1.pdf [file d3dt02892e1.pdf]

## Supporting information

### Synthesis of $\text{TiO}_x\text{N}_y$ oxynitrides with a tunable nitrogen content

Wenqian Chen <sup>a,b\*</sup>, Jinkun Li <sup>a,b</sup>, Zihan Wang <sup>a,b</sup>, Heng Wang <sup>c</sup>, Yong Li <sup>d</sup> and Liang Tang <sup>a,b\*</sup>

<sup>a</sup> School of Environmental and Chemical Engineering, Shanghai University, Shanghai 200444, PR China

<sup>b</sup> Key Laboratory of Organic Compound Pollution Control Engineering, Ministry of Education, Shanghai University, Shanghai 200444, PR China

<sup>c</sup> School of science, Shanghai University, Shanghai 200444, PR China

<sup>d</sup> State Key Laboratory of Space Power-Sources Technology, Shanghai Institute of Space Power-Sources, Shanghai 200000, PR China

\*Corresponding author. E-mail addresses: wenqianchen@shu.edu.cn (W. Q. Chen), tang1liang@shu.edu.cn (L. Tang)

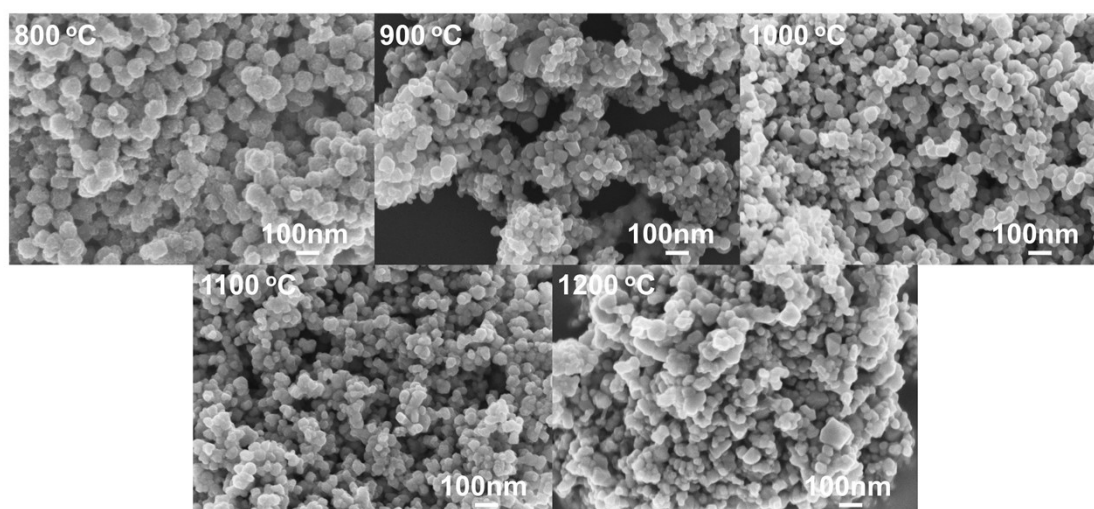

**Figure S1.** SEM images of oxynitrides  $\text{TiO}_x\text{N}_y$  synthesized at 800-1200 °C.

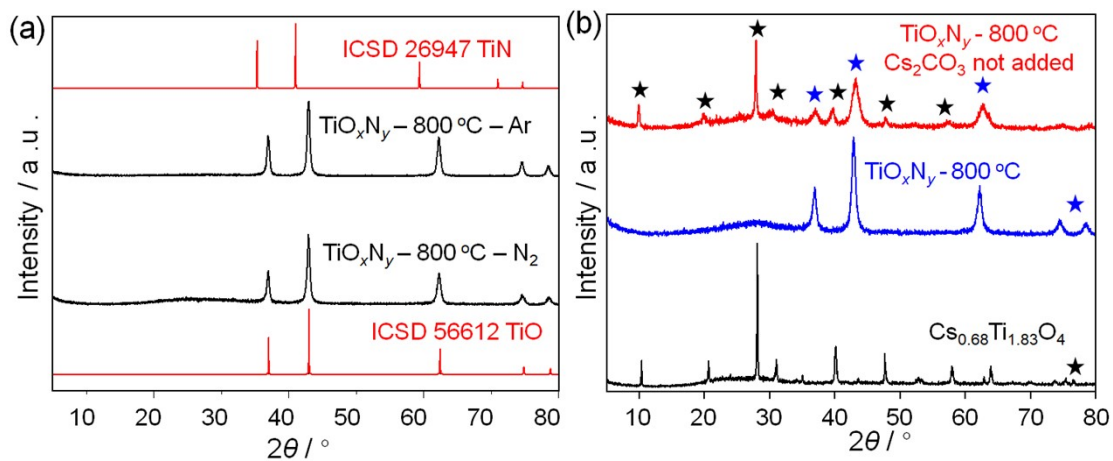

**Figure S2.** XRD pattern of (a)  $\text{TiO}_x\text{N}_y$  synthesized at  $800\text{ }^\circ\text{C}$  under  $\text{N}_2$ , Ar atmosphere, (b)  $\text{TiO}_x\text{N}_y$  synthesized at  $800\text{ }^\circ\text{C}$  with and without  $\text{Cs}_2\text{CO}_3$ . ( $\star$ :  $\text{Cs}_{0.68}\text{Ti}_{1.83}\text{O}_4$  phase,  $\star$ :  $\text{TiO}_x\text{N}_y$  phase).

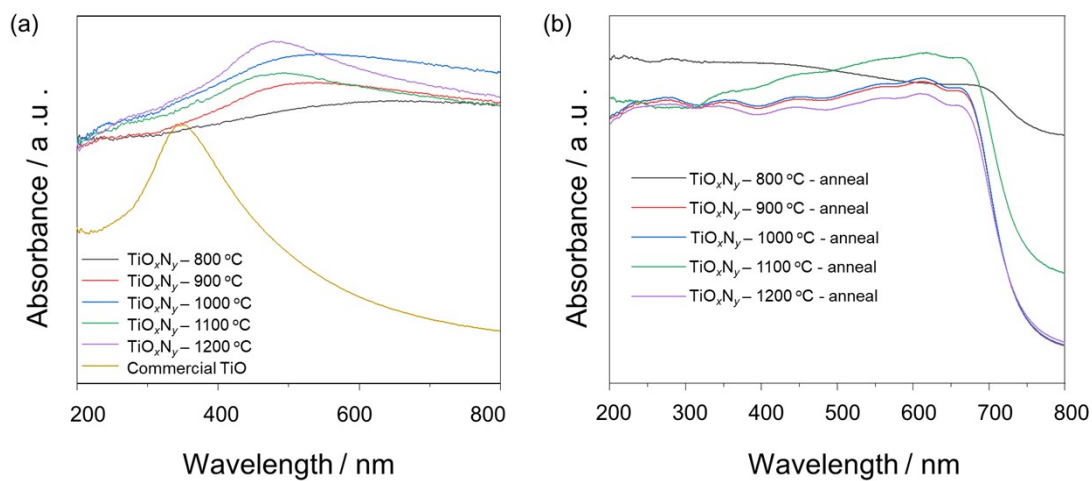

**Figure S3.** UV-vis spectroscopy. (a) Commercial TiO and  $\text{TiO}_x\text{N}_y$  synthesized at  $800\text{--}1200\text{ }^\circ\text{C}$ . (b)  $\text{TiO}_x\text{N}_y$  annealed at  $350\text{ }^\circ\text{C}$  for 3h.

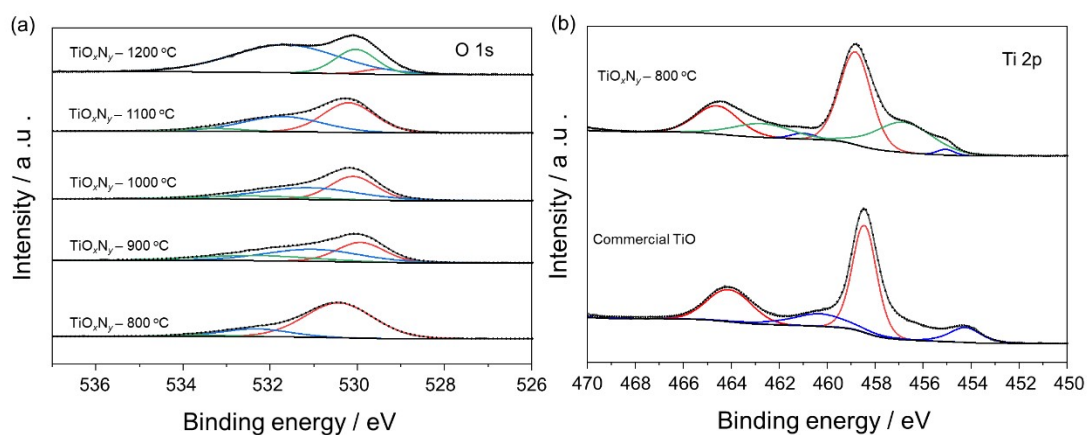

**Figure S4.** (a) Analysis energy spectrum of  $\text{TiO}_x\text{N}_y$  at different temperatures by XPS (O 1s). (b) Analysis energy spectrum of  $\text{TiO}_x\text{N}_y$  synthesized at 800 °C and commercial TiO by XPS (Ti 2p).

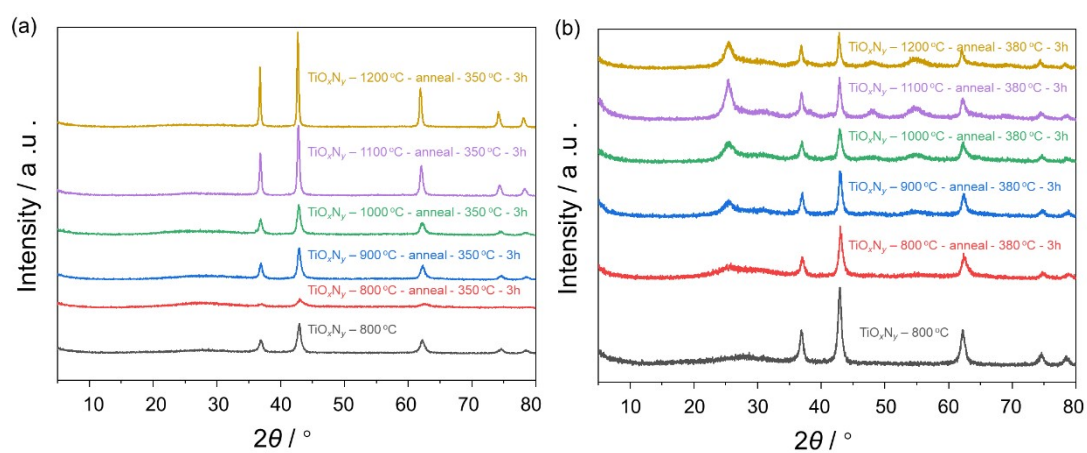

**Figure S5.** XRD patterns of  $\text{TiO}_x\text{N}_y$  annealed in air at different temperatures (a) 350 °C, (b) 380 °C.

## Regulating the bandgap

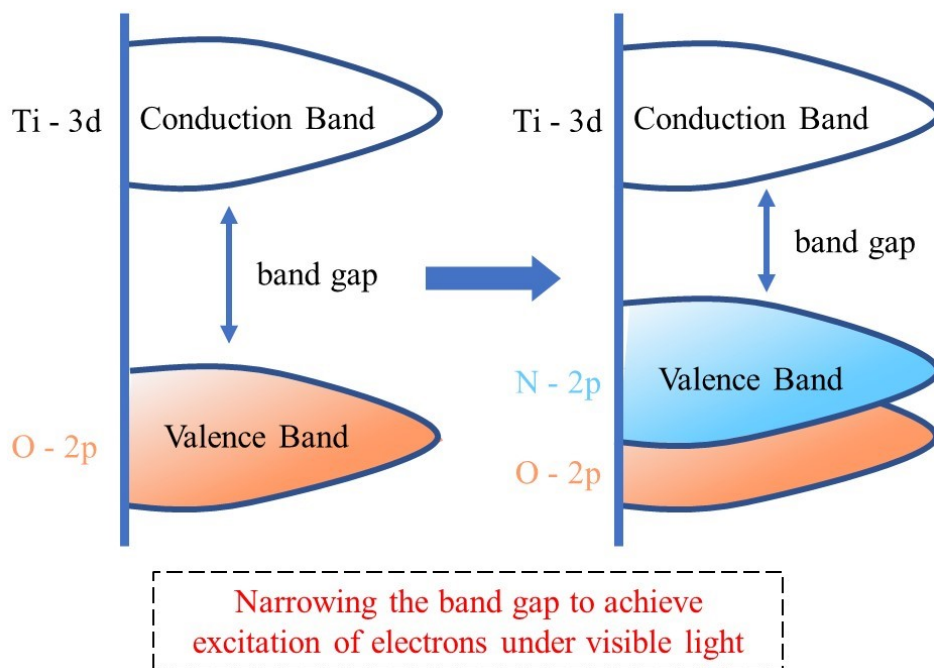

Figure S6. Schematic diagram of  $\text{TiO}_2$  and  $\text{TiO}_x\text{N}_y$  energy bands

**Table S1.** The weight percent of N and C of oxynitride was obtained by elemental analyzer.

|         | N / wt% | C / wt% |
|---------|---------|---------|
| 800 °C  | 13.05   | 8.02    |
| 900 °C  | 17      | 6.994   |
| 1000 °C | 16.3    | 11.77   |
| 1100 °C | 19.72   | 1.92    |
| 1200 °C | 19.92   | 2.02    |

**Table S2.** Lattice parameters and atomic occupancy of  $\text{TiO}_x\text{N}_y$  synthesized at 800 - 1100 °C determined by Rietveld analysis.

|                                   | a (Å)   | b (Å)   | c (Å)   |
|-----------------------------------|---------|---------|---------|
| $\text{TiO}_x\text{N}_y$ -800 °C  | 4.2299  | 4.2299  | 4.2299  |
| $\text{TiO}_x\text{N}_y$ -900 °C  | 4.235   | 4.235   | 4.235   |
| $\text{TiO}_x\text{N}_y$ -1000 °C | 4.23489 | 4.23489 | 4.23489 |
| $\text{TiO}_x\text{N}_y$ -1100 °C | 4.2363  | 4.2363  | 4.2363  |

**Table S3.** Refined structural parameters of synchrotron XRD data for  $\text{TiO}_x\text{N}_y$  synthesized at 800 - 1100 °C.

|                                   | Atom | Coordinates |         |         | Uiso / Å <sup>2</sup> | site |
|-----------------------------------|------|-------------|---------|---------|-----------------------|------|
|                                   |      | x           | y       | z       |                       |      |
| $\text{TiO}_x\text{N}_y$ -800 °C  | Ti   | 0.00000     | 0.00000 | 0.00000 | 0.002                 | 4a   |
|                                   | N    | 0.50000     | 0.50000 | 0.50000 | 0.001                 | 4b   |
|                                   | O    | 0.50000     | 0.50000 | 0.50000 | 0.001                 | 4b   |
| $\text{TiO}_x\text{N}_y$ -900 °C  | Ti   | 0.00000     | 0.00000 | 0.00000 | 0.002                 | 4a   |
|                                   | N    | 0.50000     | 0.50000 | 0.50000 | 0.001                 | 4b   |
|                                   | O    | 0.50000     | 0.50000 | 0.50000 | 0.001                 | 4b   |
| $\text{TiO}_x\text{N}_y$ -1000 °C | Ti   | 0.00000     | 0.00000 | 0.00000 | 0.003                 | 4a   |
|                                   | N    | 0.50000     | 0.50000 | 0.50000 | 0.001                 | 4b   |
|                                   | O    | 0.50000     | 0.50000 | 0.50000 | 0.001                 | 4b   |
| $\text{TiO}_x\text{N}_y$ -1100 °C | Ti   | 0.00000     | 0.00000 | 0.00000 | 0.003                 | 4a   |
|                                   | N    | 0.50000     | 0.50000 | 0.50000 | 0.001                 | 4b   |
|                                   | O    | 0.50000     | 0.50000 | 0.50000 | 0.001                 | 4b   |
